## CORRECTION

# Correction: Lombard effect onset times reveal the speed of vocal plasticity in a songbird

**Samuel I. Hardman, Sue Anne Zollinger, Klemen Koselj, Stefan Leitner, Rupert C. Marshall and Henrik Brumm**

There was an error published in *J. Exp. Biol.* **220**, 1065-1071.

Eqn 2 was displayed incorrectly. The correct equation appears below.

$$\text{SPL increase} = \sqrt{2^{\left(\frac{\text{dB increase}}{6 \times 2}\right)}}$$

We apologise to the authors and readers for any inconvenience this may have caused.
